# Supplementary material for: Evolution of an Alpine proglacial river during 7 decades of deglaciation
Source: Copernicus journal article supplement (doi:10.5194/esurf-11-383-2023), 2023-05-08
Supplement: Supplementary file 1 [file esurf-11-383-2023-supplement.pdf]

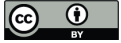

*Supplement of*

## **Evolution of an Alpine proglacial river during 7 decades of deglaciation**

**Livia Piermattei et al.**

*Correspondence to:* Livia Piermattei ([livia.piermattei@wsl.ch](mailto:livia.piermattei@wsl.ch))

The copyright of individual parts of the supplement might differ from the article licence.

## S1 Topographic data processing and post-processing of historical and digital aerial images and LiDAR data

**Table S1: Attributes of the aerial images. \* Only orthophoto is generated.**

| Acquisition date<br>(aerial image type) | No. processed<br>Photos | Camera Model<br>(Band)    | Focal length<br>[mm] | Flying height<br>above terrain<br>[m] | GSD (processed<br>GSD) [m] |
|-----------------------------------------|-------------------------|---------------------------|----------------------|---------------------------------------|----------------------------|
| 8 Sep 1953 (film)                       | 124                     | Wild RC5 (BW)             | 210.1                | 3330                                  | 0.23                       |
| 7 Oct 1969 (film)                       | 23                      | Wild RC5/RC8 (BW)         | 152.0                | 5050                                  | 0.45                       |
| 29 Sep 1970 (film)                      | 32                      | Wild RC5/RC8 (BW)         | 210.4                | 3450                                  | 0.19 (0.38)                |
| 18 Aug 1971 (film)                      | 39                      | Wild RC5/RC8 (BW)         | 209.5                | 3080                                  | 0.16 (0.35)                |
| 13 Sep 1982 (film)                      | 34                      | Wild RC10 (BW)            | 152.6                | 6090                                  | 0.52                       |
| 24 Sep 1983 (film)                      | 7                       | Wild RC10 (BW)            | 152.6                | 4840                                  | 0.40                       |
| 10 Oct 1990 (film)                      | 35                      | Wild RC10 (BW)            | 152.6                | 5850                                  | 0.53                       |
| 11 Sep 1997 (film)                      | 25                      | Wild RC10 (BW)            | 152.7                | 6010                                  | 0.56                       |
| 5 Sep 2003 (film)                       | 59                      | — (RGB)                   | 305.1                | 4800                                  | 0.24                       |
| 9 Sep 2009 (digital)                    | 142                     | — (RGB)                   | —                    | 3200                                  | 0.17                       |
| 31 Jul 2010 (digital)                   | 413                     | — (RGBN)                  | —                    | 2870                                  | 0.16                       |
| 18 Jul 2014 (digital)*                  | 819                     | Hasselblad H3DII-50 (RGB) | —                    | 674                                   | 0.07                       |
| 5 Oct 2015 (digital)*                   | 94                      | UltraCamX (RGBN)          | —                    | 3250                                  | 0.18                       |
| 29-30 July 2019                         | 9567                    | DJI Phantom Pro           | —                    | 40-100                                | 0.01-0.10                  |

**Table S2: Attributes of LiDAR data.**

| Acquisition date | Type | Scanner model         | Wavelength<br>[nm] | Operator                                                          | Average point<br>density*<br>[pts/m <sup>2</sup> ] |
|------------------|------|-----------------------|--------------------|-------------------------------------------------------------------|----------------------------------------------------|
| 5 Sept 2006      | ALS  | -                     | -                  | Land Tirol                                                        | 4.9                                                |
| 2008             | ALS  | -                     | -                  | Land Tirol                                                        | 3.3                                                |
| 4 Jul 2012       | ALS  | Riegl LMS Q680i-S     | 1064               | Milan Geoservice GmbH (commissioned)                              | 12.7                                               |
| 18 Jul 2012      | ALS  | Riegl LMS Q680i-S     | 1064               | Milan Geoservice GmbH (commissioned)                              | 12.3                                               |
| 25 Oct 2012      | ALS  | Riegl LMS<br>Q680/400 | 1550               | Milan Geoservice GmbH (commissioned)                              | 9.6                                                |
| 18 Jul 2014      | ALS  | Riegl LMS VQ580       | 1064               | Milan Geoservice GmbH (commissioned)                              | 9.6                                                |
| 10 July 2015     | ALS  | -                     | near infrared      | -                                                                 | 20.2                                               |
| 22 Aug 2015      | ALS  | -                     | near infrared      | -                                                                 | 38.0                                               |
| 5 Jun 2017       | ALS  | Riegl VuxSys-LR       | 1550               | Chair of Physical Geography University of<br>Eichstätt-Ingolstadt | 19.9                                               |
| 25 June 2019     | TLS  | VZ-4000/Riegl         | near infrared      | Chair of Physical Geography University of<br>Eichstätt-Ingolstadt | 222                                                |

The “Amt der Tiroler Landesregierung” (<https://www.tirol.gv.at/en/>) and the “Bundesamt für Eich- und Vermessungswesen” (BEV) (<https://www.bev.gv.at>) provide the historical aerial photographs as scanned images in tiff format with jpeg compression. The scanning resolution is 15  $\mu\text{m}$  with the exception of the 1970 and 1971 datasets, which are scanned at 12  $\mu\text{m}$ . The historical aerial images covered 8 periods from 1953 to 2003 (Table S1). The scanned images are processed with the Agisoft Metashape software and a comparison is made with the Inpho software with the 2003 dataset used in this work. The Metashape v1.5 software can process the film camera using fiducial marks. Note that cropping the image is a necessary step because each image must have the same number of pixels in order to be recognized as having been acquired by the same camera and consequently share

the same calibration parameters. Black border masking is not required but is recommended because it can interfere with the orientation of the camera. For the orientation, the number of key and tie points is set to zero to have the maximum number of detectable feature points; orientation is performed at full image resolution (called ultra-high in the software). Despite the availability of the calibration protocol, it is preferred not to keep the calibration parameters fixed during orientation and bundle adjustment. However, this functionality must be verified. The camera optimization parameters include the focal length, the fiducial centre, and radial and tangential distortion. The GCPs used for co-registration and camera optimization were selected from the 2017 LiDAR point cloud (Fig. S1 bottom right), with an estimated horizontal and vertical accuracy of approximately 25 cm.

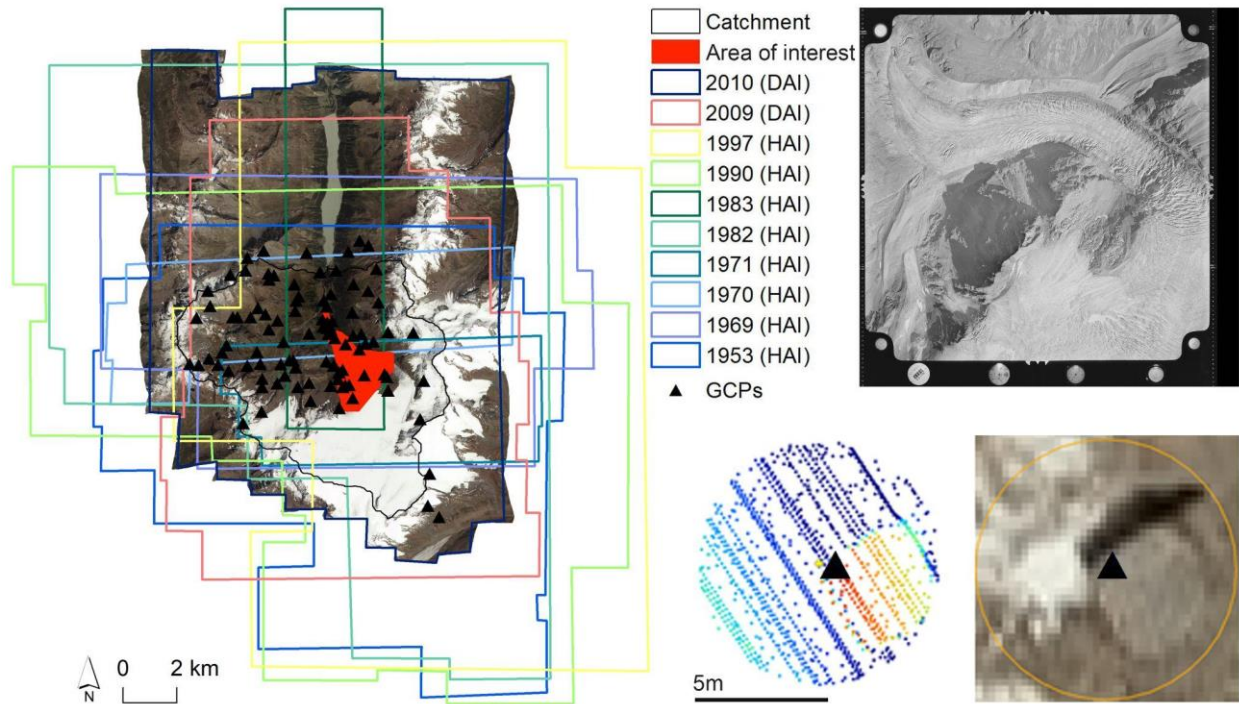

**Figure S1:** On the left, images footprint of historical (HAI) and digital (DAI) aerial images for each aerial flight with the location of the GCPs overlaid to the 2010 orthophoto. The selection of one GCP on the reference 3D ALS 2017 point cloud colored by elevation and its corresponding location on the 2010 orthophoto is shown on the bottom right. On the top right, a scanned image of the 1953 aerial flight photographing the glacier tongue.

GCPs were evenly distributed throughout the entire catchment (Fig. S1). However, a large number of GCPs were identified within the area of interest with approximately 15 GCPs per stereo pair.

Additional digital aerial images provided by BEV were collected in 2009 and 2010 with RGB and NIR information. Available aerial images from 2014 and 2015 from the “Amt der Tiroler Landesregierung” are processed in order to generate high-resolution orthophotos. The processing of the aerial images as well as the UAVs images did not involve any data preparation and thus processing begins with camera orientation followed by GCPs selection and bundle block adjustment, dense cloud generation, and export of the orthophoto. Note that the same GCPs adopted for the historical images were also used for these datasets. Dense image matching was performed at half the resolution of the images to reduce calculation time and file size.

The companies that collected the data (see Table S2) provided all the airborne LiDAR point clouds, with the exception of the 2017 Lidar data was collected by us. We used a Riegl VuxSys-LR integrated into a helipod, mounted on a Eurocopter AS350-B3 Ecureuil helicopter. The entire Kaunertal catchment was scanned along a total of 50 profile lines at a flight altitude of approximately 150 meters. The recorded raw trajectory was processed with a GNSS recording base station within the Kaunertal, located at the Weißseeferner (Applanix Pospac), and linked

to the raw LiDAR data in the Riegl Riprocess software. In Riprocess, an initial fine referencing of the individual flight strips was carried out with the reprocessing tool before the final strip adjustment. For the collection and processing of TLS data, please refer to Altmann et al. (2020).

All the photogrammetric and ALS point clouds are co-registered with the ALS 2017 point cloud before raster interpolation. The post-processing workflow from point cloud to DEM generation is shown in Fig. S2.

A stable area mask corresponding to the year 2015 is generated using the RGBNIR orthophoto (Figure S3). This mask is then adjusted for each epoch by removing (i) the glacier extent, (ii) any snow patches, and (iii) all pixels with an absolute height difference with the reference ALS 2017 greater than 1 m (for historical DEMs) and 0.50 m (for all DEMs after 2003). ICP co-registration is performed using Opals Module ICP. The point clouds were then interpolated into a raster using a robust moving window. The raster resolution was 1 m for the archive aerial images (from 1953 to 2003) and 0.5 m for the remaining DEMs. Gaps in the raster were filled with a moving plane interpolation with inverse distance weighting. The uncertainty estimation of each DEM was performed on the same stable area used for the ICP co-registration by means of a DEM of differences between the slave DEM and the reference DEM (ALS 2017).

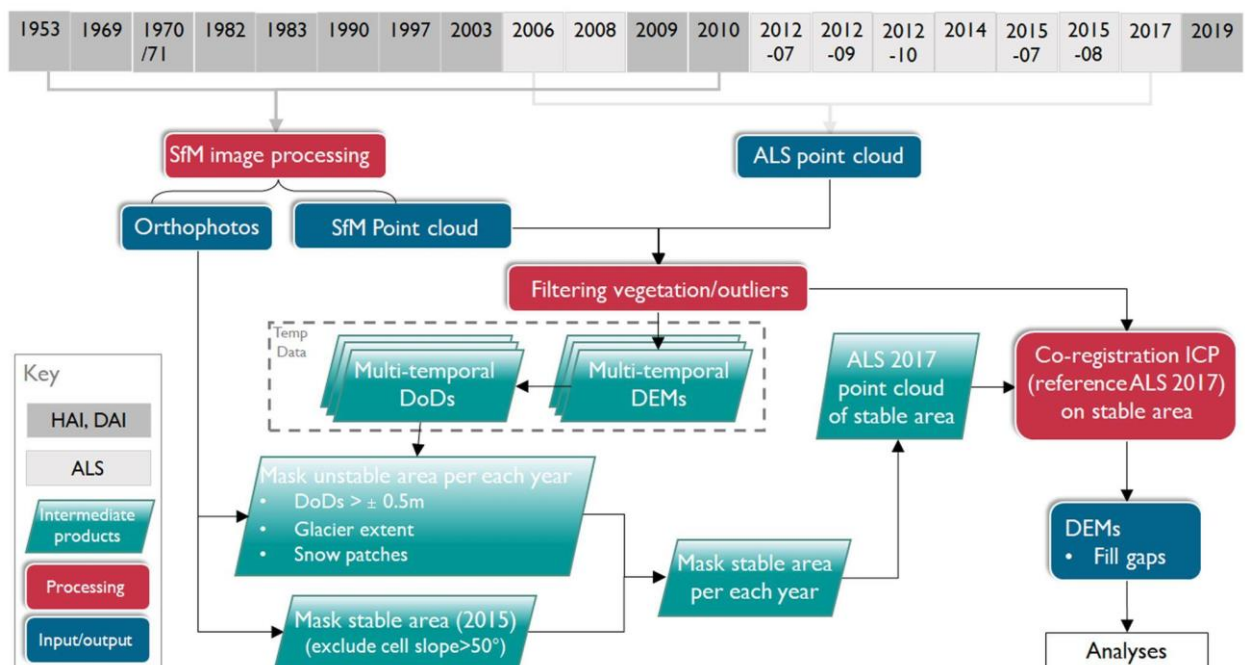

**Figure S2: Diagram of the post-processing workflow of 3D point cloud from ALS and historical and digital aerial images (HAI & DAI). Red and blue rectangles show the processes, and the input/outputs data, respectively, and the trapezoids indicate intermediate products.**

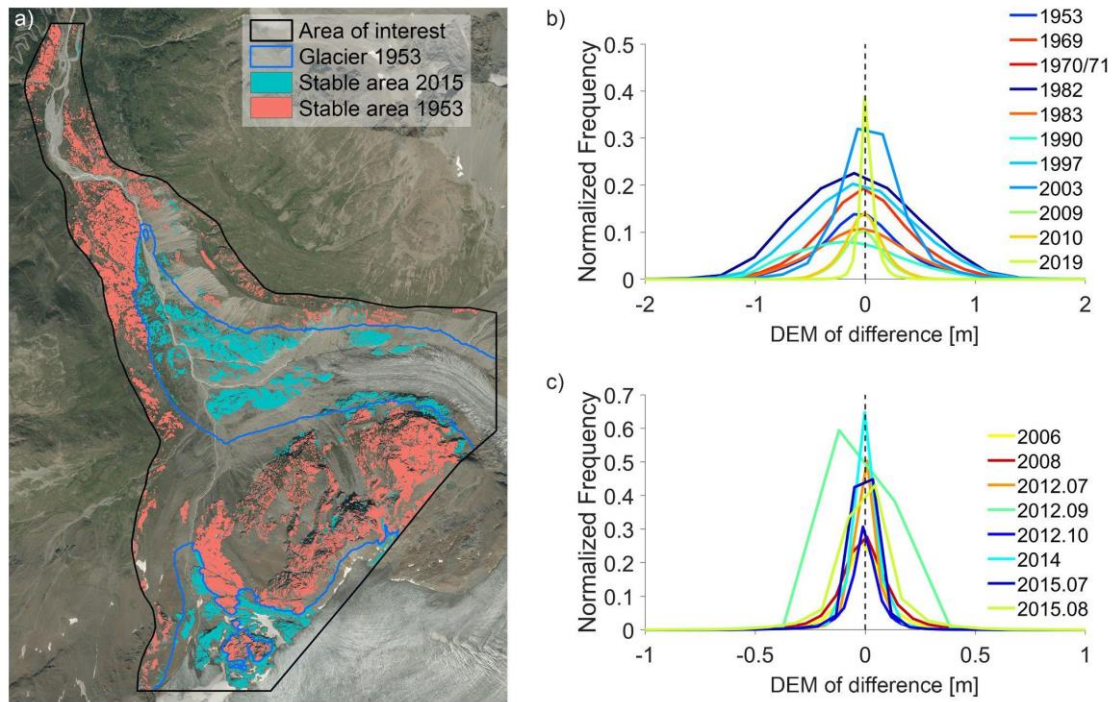

**Figure S3:** a) Mask of stable area for the year of 1953 and 2015 used for DEM co-registration and the normalized histogram of the elevation difference (DEM of difference) of b) the photogrammetric and c) LiDAR DEMs with respect to the reference ALS 2017.

**Table S3:** Elevation difference in meters with the reference ALS 2017 DEM over the stable area. The  $\sigma_{MAD}$  is used for uncertainty estimation.

| Year <sub>DEM</sub> | Elevation difference with the reference ALS 2017 DEM [m] |      |       |          |        |      |                |
|---------------------|----------------------------------------------------------|------|-------|----------|--------|------|----------------|
|                     | Min                                                      | Max  | Mean  | $\sigma$ | Median | RMSE | $\sigma_{MAD}$ |
| 1953                | -7.09                                                    | 5.06 | -0.03 | 0.40     | -0.04  | 0.40 | 0.31           |
| 1969                | -9.78                                                    | 8.81 | 0.01  | 0.43     | 0.00   | 0.43 | 0.33           |
| 1970                | -34.42                                                   | 4.40 | -0.01 | 0.32     | -0.01  | 0.32 | 0.23           |
| 1982                | -21.73                                                   | 8.52 | -0.08 | 0.52     | -0.09  | 0.53 | 0.41           |
| 1983                | -6.89                                                    | 4.28 | -0.02 | 0.44     | -0.03  | 0.44 | 0.35           |
| 1990                | -6.31                                                    | 3.62 | -0.16 | 0.48     | -0.18  | 0.51 | 0.39           |
| 1997                | -19.65                                                   | 5.24 | -0.04 | 0.49     | -0.05  | 0.49 | 0.39           |
| 2003                | -19.32                                                   | 3.46 | 0.06  | 0.31     | 0.05   | 0.31 | 0.22           |
| 2006                | -3.30                                                    | 2.40 | -0.01 | 0.12     | -0.01  | 0.12 | 0.08           |
| 2008                | -4.34                                                    | 2.62 | 0.00  | 0.13     | -0.01  | 0.13 | 0.09           |
| 2009                | -2.38                                                    | 2.31 | -0.02 | 0.20     | -0.02  | 0.21 | 0.16           |
| 2010                | -3.71                                                    | 2.21 | -0.02 | 0.20     | -0.01  | 0.20 | 0.15           |
| 2012.07             | -3.66                                                    | 2.72 | -0.01 | 0.08     | 0.00   | 0.08 | 0.05           |
| 2012.09             | -20.48                                                   | 4.81 | -0.01 | 0.10     | 0.00   | 0.10 | 0.05           |
| 2012.10             | -2.18                                                    | 2.12 | -0.01 | 0.10     | -0.01  | 0.10 | 0.06           |
| 2014                | -4.01                                                    | 4.43 | 0.00  | 0.08     | 0.00   | 0.08 | 0.05           |
| 2015.07             | -4.92                                                    | 3.41 | -0.01 | 0.08     | -0.01  | 0.08 | 0.05           |
| 2015.08             | -5.43                                                    | 6.60 | 0.00  | 0.16     | 0.00   | 0.16 | 0.09           |
| 2019                | -1.94                                                    | 3.17 | 0.02  | 0.11     | 0.01   | 0.11 | 0.06           |
| 2019                | -2.26                                                    | 1.82 | 0.03  | 0.12     | 0.01   | 0.12 | 0.06           |



## S2 Sediment volume of active floodplains and lateral hillslopes

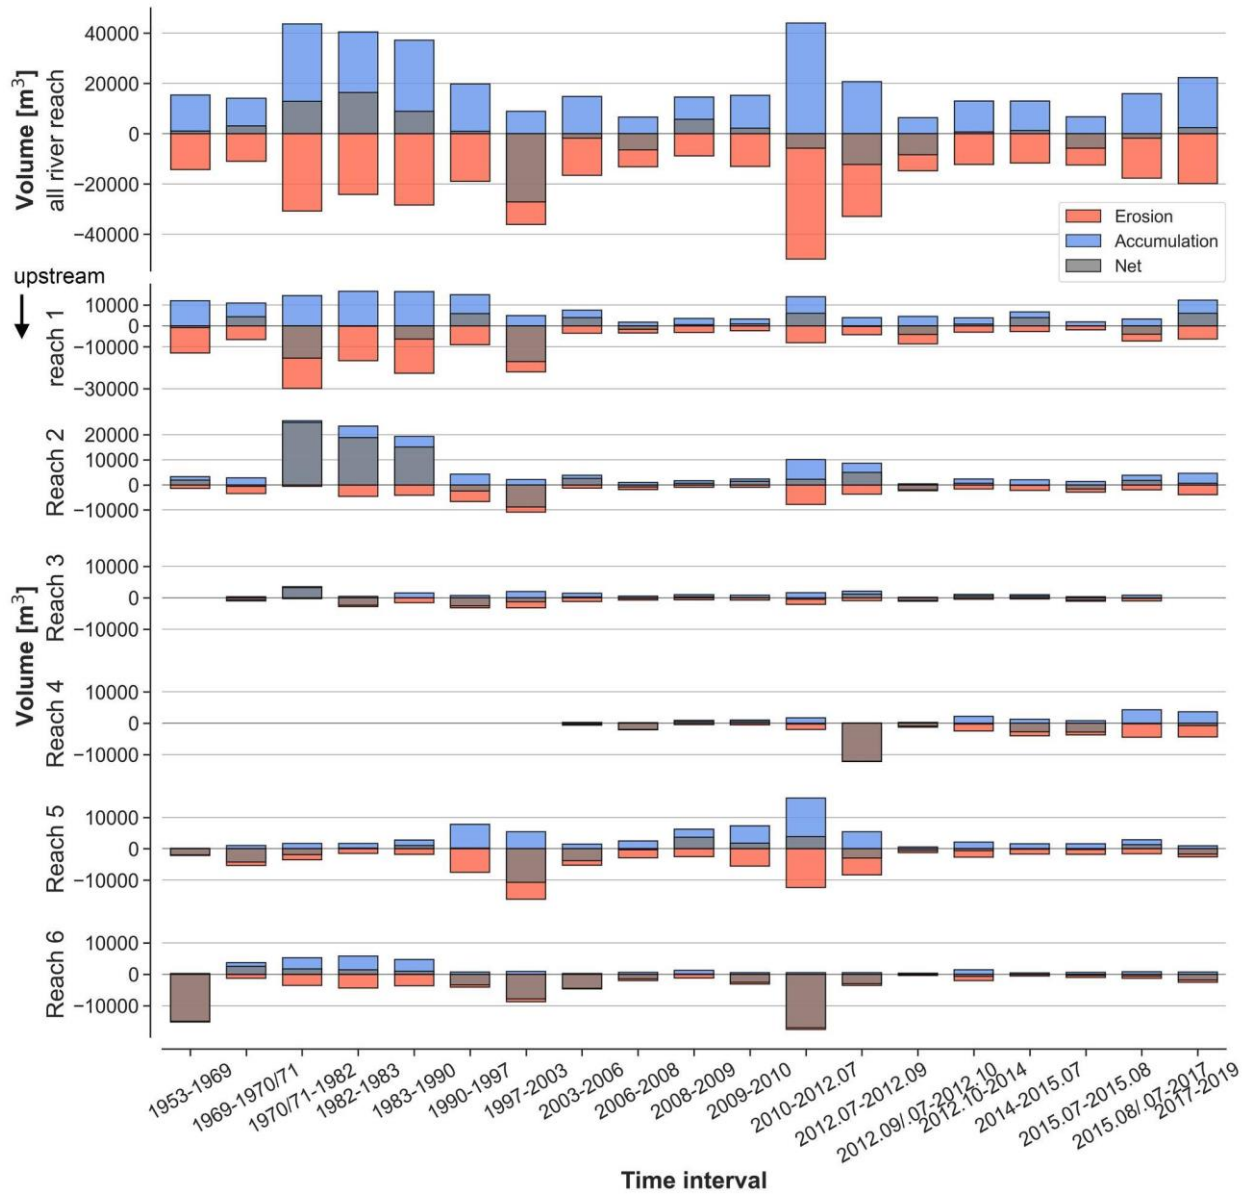

**Figure S4:** Visualization of the sediment volume of all connected active floodplains (i.e. “all river reaches”) and for each river reach for each time step. Note that due to glacier retreat reaches 4, 5 and 6 are connected to downstream river reaches from 2003 onwards. Therefore, the total volume of the first time step (1953-1969) is only composed of river reaches 1 and 2; river reach 3 is included in the total volume from the second time step onwards.

**Table S4:** For each time step the area change of the active floodplain, the sediment volume estimation, the sigma volume ( $\sigma_v$ ) (i.e. the  $\sigma_{MAD}$  derived with respect to ALS 2017 DEM (Table S1) multiplied by the area) and the net volume rate. Elevation difference on stable terrain between consecutive DEMs and their common stable terrain is also reported.

| Time step    | DEM of difference on stable terrain consecutive DEMs |             |                 | Area active channel<br>[m <sup>2</sup> ] | Volume erosion<br>[m <sup>3</sup> ] | Volume deposition<br>[m <sup>3</sup> ] | Net Volume<br>[m <sup>3</sup> ] | $\sigma_v$<br>[m <sup>3</sup> ] | Net volume rate<br>[m <sup>3</sup> yr <sup>-1</sup> ] |
|--------------|------------------------------------------------------|-------------|-----------------|------------------------------------------|-------------------------------------|----------------------------------------|---------------------------------|---------------------------------|-------------------------------------------------------|
|              | Common Stable Area<br>[m <sup>2</sup> ]              | Mean<br>[m] | $\sigma$<br>[m] |                                          |                                     |                                        |                                 |                                 |                                                       |
| 1953-1969    | 530430                                               | -0.06       | 0.49            | 103346                                   | -14335                              | 15396                                  | 1061                            | 46792                           | 66                                                    |
| 1969-1970/71 | 630395                                               | 0.02        | 0.46            | 120654                                   | -10972                              | 14082                                  | 3110                            | 48532                           | 1555                                                  |

|                 |         |       |      |        |        |       |        |       |        |
|-----------------|---------|-------|------|--------|--------|-------|--------|-------|--------|
| 1970/71-1982    | 497210  | 0.08  | 0.58 | 120521 | -30793 | 43638 | 12845  | 56658 | 1168   |
| 1982-1983       | 438541  | -0.07 | 0.56 | 118786 | -24120 | 40517 | 16398  | 64035 | 16398  |
| 1983-1990       | 428281  | 0.18  | 0.58 | 115894 | -28335 | 37202 | 8866   | 60731 | 1267   |
| 1990-1997       | 435792  | -0.16 | 0.54 | 123833 | -18903 | 19813 | 910    | 68299 | 130    |
| 1997-2003       | 586418  | -0.09 | 0.52 | 129704 | -36048 | 8938  | -27110 | 58078 | -4518  |
| 2003-2006       | 807194  | 0.06  | 0.30 | 131912 | -16557 | 14764 | -1793  | 30880 | -598   |
| 2006-2008       | 915237  | 0.00  | 0.12 | 133945 | -13102 | 6641  | -6461  | 16129 | -3230  |
| 2008-2009       | 900209  | 0.02  | 0.18 | 136164 | -8832  | 14608 | 5776   | 24996 | 5776   |
| 2009-2010       | 904266  | -0.01 | 0.15 | 138860 | -13079 | 15303 | 2224   | 30454 | 2224   |
| 2010-2012.07    | 923270  | -0.01 | 0.19 | 149740 | -49815 | 44055 | -5760  | 23676 | -2880  |
| 2012.07-2012.09 | 541637  | 0.00  | 0.08 | 154528 | -32961 | 20762 | -12199 | 10927 | -12199 |
| 2012.09-2012.10 | 439991  | 0.01  | 0.20 | 154353 | -14752 | 6436  | -8317  | 12055 | -8317  |
| 2012.10-2014    | 728849  | -0.01 | 0.22 | 160594 | -12286 | 12956 | 670    | 12543 | 335    |
| 2014-2015.07    | 1002517 | 0.00  | 0.06 | 161352 | -11666 | 13003 | 1337   | 11409 | 1337   |
| 2015.07-2015.08 | 820669  | 0.00  | 0.09 | 160617 | -12440 | 6689  | -5751  | 16537 | -5751  |
| 2015.08-2017    | 1071731 | 0.00  | 0.16 | 164386 | -17691 | 15908 | -1783  | 17781 | -891   |
| 2017-2019       | 122925  | 0.02  | 0.11 | 172072 | -19874 | 22281 | 2407   | 10324 | 1204   |

**Table S5: Sediment volume estimation for selected time steps of hillslope 1 and hillslope 2 connected to river reach 2 and 5, respectively.**

| Time step    | Lateral Hillslope 1<br>connected to river reach 2 |                   |                   |                   |                   |                                    | Lateral Hillslope 2<br>connected to river reach 5 |                   |                   |                   |                   |                                    |
|--------------|---------------------------------------------------|-------------------|-------------------|-------------------|-------------------|------------------------------------|---------------------------------------------------|-------------------|-------------------|-------------------|-------------------|------------------------------------|
|              | Area                                              | Volume erosion    | Volume deposition | Net volume change | $\sigma_v$        | Net volume change rate             | Area                                              | Volume erosion    | Volume deposition | Net volume change | $\sigma_v$        | Net volume change rate             |
|              | [m <sup>2</sup> ]                                 | [m <sup>3</sup> ] | [m <sup>3</sup> ] | [m <sup>3</sup> ] | [m <sup>3</sup> ] | [m <sup>3</sup> yr <sup>-1</sup> ] | [m <sup>2</sup> ]                                 | [m <sup>3</sup> ] | [m <sup>3</sup> ] | [m <sup>3</sup> ] | [m <sup>3</sup> ] | [m <sup>3</sup> yr <sup>-1</sup> ] |
| 1953-1971    | 35666                                             | -119903           | 11205             | -108698           | 13767             | -6054                              | -                                                 | -                 | -                 | -                 | -                 | -                                  |
| 1971-1982    | 128996                                            | -148605           | 89725             | -58880            | 60642             | -5314                              | -                                                 | -                 | -                 | -                 | -                 | -                                  |
| 1982-1997    | 127191                                            | -118527           | 73736             | -44791            | 71973             | -2974                              | 47800                                             | -45606            | 24429             | -21177            | 27048             | -1406                              |
| 1997-2003    | 133892                                            | -99997            | 15804             | -84193            | 59953             | -14194                             | 56898                                             | -27087            | 8250              | -18836            | 25477             | -3176                              |
| 2003-2008    | 135306                                            | -34642            | 15462             | -19180            | 32162             | -3840                              | 56203                                             | -11274            | 3686              | -7588             | 13359             | -1518                              |
| 2008-2012.07 | 132425                                            | -16288            | 9569              | -6719             | 13634             | -1732                              | 53606                                             | -18663            | 3694              | -14970            | 5519              | -3742                              |
| 2012.07-2017 | 131919                                            | -15496            | 10002             | -5494             | 6596              | -1125                              | 52337                                             | -9992             | 3725              | -6267             | 2617              | -1253                              |

### S3 Water mapping of the active floodplain

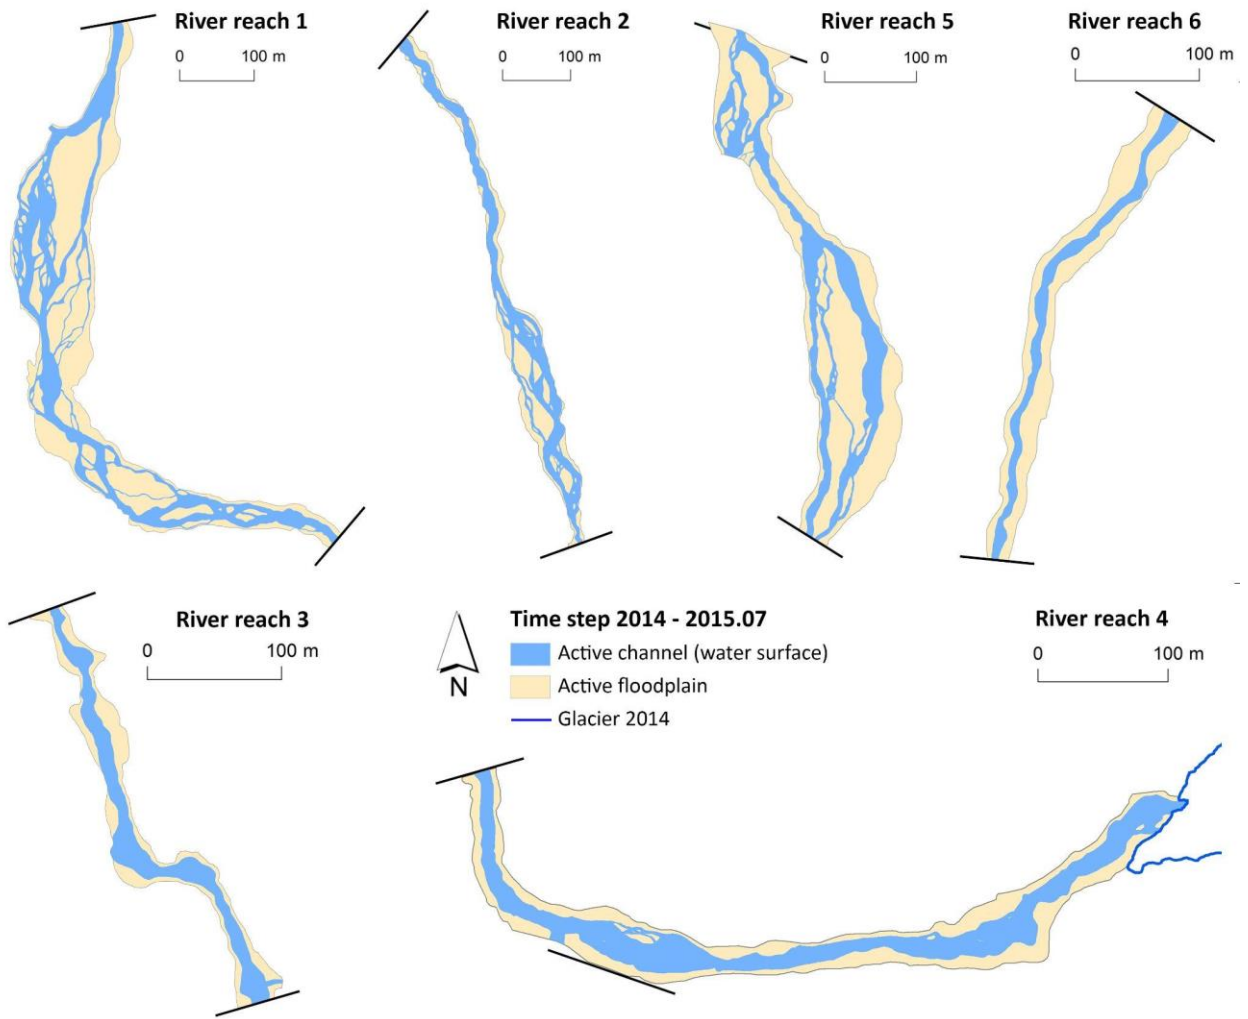

**Figure S5: The mapping of the active floodplain and active channel (i.e. the water surface) for every river reach for the time step 2014-2015 July.**
